# Supplementary material for: A Global Evaluation of the Performance Indicators of Colorectal Cancer Screening with Fecal Immunochemical Tests and Colonoscopy: A Systematic Review and Meta-Analysis
Source: MDPI journal article supplement (doi:10.3390/cancers14041073), 2022-02-21
Supplement: s1 [file s1]

**Table S1.** Search strategy for article selection.

| Database     | Search Strategy                                                                                                                                                                                                                                                                                                                                                                                                                                                                                                                                                                                                                                                                                                                                                                                                                                                                                                                                                                                                                                                                                                                                                                                                                                                                                                                                                                                                                                                                                                                                                                                                                                                                                                                                                                                                                                                                                                                                                                                                                                                                                                                                                                                                                                                                    | Result |
|--------------|------------------------------------------------------------------------------------------------------------------------------------------------------------------------------------------------------------------------------------------------------------------------------------------------------------------------------------------------------------------------------------------------------------------------------------------------------------------------------------------------------------------------------------------------------------------------------------------------------------------------------------------------------------------------------------------------------------------------------------------------------------------------------------------------------------------------------------------------------------------------------------------------------------------------------------------------------------------------------------------------------------------------------------------------------------------------------------------------------------------------------------------------------------------------------------------------------------------------------------------------------------------------------------------------------------------------------------------------------------------------------------------------------------------------------------------------------------------------------------------------------------------------------------------------------------------------------------------------------------------------------------------------------------------------------------------------------------------------------------------------------------------------------------------------------------------------------------------------------------------------------------------------------------------------------------------------------------------------------------------------------------------------------------------------------------------------------------------------------------------------------------------------------------------------------------------------------------------------------------------------------------------------------------|--------|
| PubMed       | (colorectal OR bowel OR colon OR rectal) AND (cancer OR tumor OR neoplasm OR carcinoma) AND (Screening Program* OR screening programme* OR "early detection of cancer" OR "mass screening" OR "organized screening" OR "organised screening" OR "population-based screening" OR "general screening" OR "community-based screening") AND (Fecal occult blood test* OR Faecal occult blood test* OR Fecal immunochemical test* OR Faecal immunochemical test* OR Colonoscopy OR Endoscopy) AND (Performance OR Uptake rate* OR participation rate* OR compliance rate* OR adherence rate* OR Inadequate rate* OR Invalid rate* OR Positivity rate* OR Negative rate* OR Accuracy OR "Positive Predictive Value" OR "Negative Predictive Value" OR sensitivity OR specificity OR detection rate* OR Complete colonoscopy rate* OR Complication rate* OR Cecal intubation rate* OR "Colonoscope withdrawal time" OR "Quality of bowel preparation")                                                                                                                                                                                                                                                                                                                                                                                                                                                                                                                                                                                                                                                                                                                                                                                                                                                                                                                                                                                                                                                                                                                                                                                                                                                                                                                                    | 2784   |
| Ovid Medline | (colorectal OR bowel OR colon OR rectal) AND (cancer OR tumor OR neoplasm OR carcinoma) AND (Screening Program OR screening programme OR early detection of cancer OR mass screening OR population-based screening OR general screening OR community-based screening OR organized screening OR organised screening) AND (Fecal occult blood test* OR Fecal immunochemical test* OR Colonoscopy OR Endoscopy) AND (Performance OR Uptake rate* OR participation rate* OR compliance rate* OR adherence rate* OR Inadequate rate* OR Invalid rate* OR Positivity rate* OR Negative rate* OR Accuracy OR Positive Predictive Value OR PPV OR Negative Predictive Value OR NPV OR sensitivity OR specificity OR detection rate* OR Complete colonoscopy rate* OR Complication rate* OR Cecal intubation rate* OR Colonoscope withdrawal time OR Quality of bowel preparation)                                                                                                                                                                                                                                                                                                                                                                                                                                                                                                                                                                                                                                                                                                                                                                                                                                                                                                                                                                                                                                                                                                                                                                                                                                                                                                                                                                                                          | 2106   |
| Cochrane     | (colorectal OR bowel OR colon OR rectal) AND (cancer OR tumor OR neoplasm OR carcinoma) AND ("screening program" OR "screening programs" OR "screening programmes" OR "screening programmes" OR "early detection of cancer" OR "organized screening" OR "organised screening" OR "mass screening" OR "population-based screening" OR "general screening" OR "community-based screening") AND ("fecal occult blood test" OR "fecal occult blood testing" OR "fecal occult blood testings" OR "fecal occult blood tests" OR "faecal occult blood test" OR "faecal occult blood testing" OR "faecal occult blood testings" OR "fecal immunochemical test" OR "fecal immunochemical testing" OR "fecal immunochemical tests" OR "faecal immunochemical test" OR "faecal immunochemical testing" OR "faecal immunochemical tests" OR colonoscopy OR endoscopy) AND (Performance OR "uptake rate" OR "uptake rates" OR "participation rate" OR "participation rates" OR "compliance rate" OR "compliance rates" OR "adherence rate" OR "adherence rates" OR "inadequate rate" OR "inadequate rates" OR "invalid rate" OR "invalid rates" OR "positivity rate" OR "positivity rates" OR "negative rate" OR "negative rates" OR Accuracy OR "Positive Predictive Value" OR "Negative Predictive Value" OR sensitivity OR specificity OR "detection rate" OR "detection rates" OR "Complete colonoscopy rate" OR "Complete colonoscopy rates" OR "complication rate" OR "complication rates" OR "cecal intubation rate" OR "cecal intubation rates" OR "Colonoscope withdrawal time" OR "Quality of bowel preparation")                                                                                                                                                                                                                                                                                                                                                                                                                                                                                                                                                                                                                                                                     | 480    |
| EMBase       | ('colorectal' OR 'bowel' OR 'bowel'/exp OR 'colon' OR 'colon'/exp OR 'rectal') AND ('cancer' OR 'cancer'/exp OR 'tumor' OR 'tumor'/exp OR 'neoplasm' OR 'neoplasm'/exp OR 'carcinoma' OR 'carcinoma'/exp) AND ('screening program' OR 'screening program'/exp OR 'screening programmes' OR 'screening programmes' OR 'screening programme' OR 'screening programme'/exp OR 'screening programmes' OR 'early detection of cancer' OR 'early detection of cancer'/exp OR 'organized screening' OR 'organised screening' OR 'mass screening' OR 'mass screening'/exp OR 'population-based screening' OR 'general screening' OR 'community-based screening') AND ('fecal occult blood test' OR 'fecal occult blood test'/exp OR 'fecal occult blood testing' OR 'fecal occult blood testing'/exp OR 'fecal occult blood testings' OR 'fecal occult blood tests' OR 'faecal occult blood test' OR 'faecal occult blood testing' OR 'faecal occult blood tests' OR 'fecal immunochemical test' OR 'fecal immunochemical test'/exp OR 'fecal immunochemical testing' OR 'fecal immunochemical testing'/exp OR 'fecal immunochemical tests' OR 'faecal immunochemical test' OR 'faecal immunochemical testing' OR 'faecal immunochemical tests' OR 'colonoscopy'/exp OR colonoscopy OR 'endoscopy'/exp OR endoscopy) AND (Performance OR 'Performance'/exp OR 'uptake rate' OR 'uptake rates' OR 'participation rate' OR 'participation rates' OR 'compliance rate' OR 'compliance rates' OR 'adherence rate' OR 'adherence rates' OR 'inadequate rate' OR 'inadequate rates' OR 'invalid rate' OR 'invalid rates' OR 'positivity rate' OR 'positivity rates' OR 'negative rate' OR 'negative rates' OR Accuracy OR 'Accuracy'/exp OR 'Positive Predictive Value' OR 'Positive Predictive Value'/exp OR 'Negative Predictive Value' OR 'Negative Predictive Value'/exp OR sensitivity OR 'sensitivity'/exp OR specificity OR 'specificity'/exp OR 'detection rate' OR 'detection rates' OR 'Complete colonoscopy rate' OR 'Complete colonoscopy rates' OR 'complication rate' OR 'complication rate'/exp OR 'complication rates' OR 'cecal intubation rate' OR 'cecal intubation rate'/exp OR 'cecal intubation rates' OR 'Colonoscope withdrawal time' OR 'Quality of bowel preparation') | 6883   |

**Table S2.** Characteristics of included studies.

| Included Articles               | Country  | Region/City             | Sample Size | Project Period    | Age Range | Round      | FIT Number | Cut-off Value *                    |
|---------------------------------|----------|-------------------------|-------------|-------------------|-----------|------------|------------|------------------------------------|
| Abu Hassan, M. R. 2016 [1]      | Malaysia | Kedah                   | 750         | 2013              | 50-       | Initial    | 2          | -                                  |
| Auge, J. 2014 [2]               | Spain    | Barcelona               | 197,839     | 2009–2012         | 50–69     | Initial    | 1          | 100 ng/mL                          |
| Bankovic Lazarevic, D. 2016 [3] | Serbia   | -                       | 99,592      | 2013–2014         | 50–74     | Initial    | 1          | -                                  |
| Binefa, G. 2016 [4]             | Spain    | Hospitalet de Llobregat | 76,824      | Feb 2000–Nov 2012 | 50–69     | Subsequent | 1          | 100 ng/mL                          |
| Blom, J. 2019 [5]               | Sweden   | Stockholm-Gotland       | 87,269      | Oct 2015–Sep 2016 | 60–69     | Subsequent | 1          | 200 ng/mL (women), 400 ng/mL (men) |

|                                     |             |                                                                |            |                   |       |            |         |                                   |
|-------------------------------------|-------------|----------------------------------------------------------------|------------|-------------------|-------|------------|---------|-----------------------------------|
| Bujanda, L. 2015 [6]                | Spain       | Basque country                                                 | 463,927    | Apr 2009–Apr 2013 | 50–69 | Total      | 1       | 100 ng/mL                         |
| Buron, A. 2017 [7]                  | Spain       | Barcelona                                                      | 172,962    | Dec 2009–Dec 2011 | 50–69 | Initial    | 1       | 100 ng/mL                         |
| Buttigieg, G. 2018 [8]              | Malta       | -                                                              | 14,287     | Jan–Dec 2016      | 59–61 | Initial    | -       | -                                 |
| Chou, C. K. 2016 [9]                | China       | Taiwan                                                         | 3,363,896  | Jan 2004–Dec 2013 | 50–69 | Subsequent | 1       | 100, 8 & 12 ng/mL                 |
| Ciatto, S. 2007 [10]                | Italy       | Florence                                                       | 81,047     | Dec 1996–Sep 2005 | 48–76 | Subsequent | 1       | 100 ng/mL                         |
| Clark, G. 2020 [11]                 | UK          | Scotland                                                       | 919,665    | Nov 2017–Oct 2018 | 50–74 | Subsequent | 1       | 400 ng/mL                         |
| Crotta, S. 2004 [12]                | Italy       | Chatillon and St Vincent                                       | 2961       | Sep 2001–Dec 2001 | 50–74 | Initial    | 1       | 100 ng/mL                         |
| Denters, M. J. 2012 [13]            | Netherlands | Amsterdam                                                      | 11,234     | Jun 2006–Feb 2007 | 50–74 | Total      | 1       | 50 ng/mL                          |
| Fenocchi, E. 2006 [14]              | Uruguay     | Montevideo                                                     | 11,734     | Jun 1997–Jul 2004 | 50-   | Initial    | 1       | 100 ng/mL                         |
| Grazzini, G. 2000 [15]              | Italy       | Florence                                                       | 15,235     | Oct 1996–Jul 1998 | 50–70 | Initial    | 1       | -                                 |
| Grazzini, G. 2004 [16]              | Italy       | Tuscany                                                        | 192,583    | Jun 2000–Dec 2001 | 50–70 | Initial    | 1       | 100 ng/mL (80 ng/mL for one site) |
| Grazzini, G. 2009 [17]              | Italy       | Northern & Central                                             | 36,646     | Sep 2005–Jun 2007 | 50–69 | Initial    | 2       | 80 ng/mL                          |
| Guo, F. 2020 [18]                   | Belgium     | Wallonia and Brussels                                          | 28,217     | 2014–2017         | 50–74 | Subsequent | 1       | 75 ng/mL                          |
| Hoeck, S. 2019 [19]                 | Belgium     | Flanders                                                       | 1,184,462  | 2013–2014         | 56–74 | Initial    | -       | -                                 |
| Kapidzic, A. 2015 [20]              | Netherlands | Rotterdam                                                      | 17,808     | Nov 2006–Dec 2010 | 50–74 | Total      | 1       | 50 ng/mL                          |
| Khuhaprema, T. 2014 [21]            | Thailand    | Lampang                                                        | 127,301    | Apr 2011–Nov 2012 | 50–65 | Initial    | 1       | 200 ng/mL                         |
| Kim, D. H. 2018 [22]                | Korea       | -                                                              | 51,439     | 2009–2015         | 50-   | Subsequent | 1       | 100 ng/mL                         |
| Koivogui, A. 2018 [23]              | France      | Seine-Saint-Denis                                              | 132,473    | 2015–Dec 2016     | 50–74 | Subsequent | 1       | 150 ng/mL                         |
| Launoy, G. D. 2005 [24]             | France      | Cotentin                                                       | 7421       | Jan 2001–Dec 2002 | 50–74 | Initial    | 2       | 20 ng/mL                          |
| Lund, M. 2019 [25]                  | Denmark     | Central Denmark Region                                         | 8256       | Jul 2015–Jun 2017 | 50–74 | Subsequent | 1       | 100 ng/mL                         |
| Manzano-Robleda, M. D. C. 2020 [26] | Mexico      | Mexico City                                                    | 892        | Oct 2017–Jan 2019 | 50–74 | Initial    | 1       | 20 ng/mL                          |
| McNamara, D. 2011 [27]              | Ireland     | -                                                              | 9993       | 2008–2010         | 50–74 | Initial    | 2       | 100 ng/mL                         |
| Miuțescu, B. 2013 [28]              | Romania     | Timisoara                                                      | 1111       | -                 | 50–74 | Initial    | -       | -                                 |
| Moss, S. 2017 [29]                  | UK          | -                                                              | 40,930     | Apr–Oct 2014      | 59–75 | Subsequent | 1       | 100 ng/mL                         |
| Nakama, H. 1996 [30]                | Japan       | Nagano                                                         | 3982       | 1991              | 40-   | Initial    | 1       | -                                 |
| Nakama, H. 2001 [31]                | Japan       | Nagano                                                         | 17,432     | 1994–1999         | 40-   | Subsequent | 4       | -                                 |
| Njor, S. H. 2018 [32]               | Denmark     | -                                                              | 1,437,836  | Mar 2014–Dec 2016 | 50–74 | Initial    | 1       | 100 ng/mL                         |
| Okada, T. 2019 [33]                 | Chile       | Santiago, Valparaíso, Punta Arenas, Coquimbo, Osorno, Valdivia | 26,444     | Jun 2012–Dec 2017 | 50–75 | Initial    | 2       | 100 ng/mL                         |
| Parente, F. 2013 [34]               | Italy       | Lecco                                                          | 159,702    | Sep 2005–Dec 2009 | 50–69 | Total      | 1       | 100 ng/mL                         |
| Park, M. J. 2011 [35]               | Korea       | -                                                              | 23,756,667 | Jan 2004–Dec 2009 | 50-   | Total      | -       | -                                 |
| Pellat, A. 2018 [36]                | France      | Paris                                                          | 409,340    | Jan 2016–Jul 2017 | 50–74 | Subsequent | 1       | 150 ng/mL                         |
| Piette, C. 2017 [37]                | France      | Ille-et-Vilaine, Brittany                                      | 162,347    | May 2015–Dec 2015 | 50–74 | Subsequent | 1       | 150 ng/mL                         |
| Portillo, I. 2018 [38]              | Spain       | Basque country                                                 | 1,377,398  | Jan 2009–Sep 2016 | 50–69 | Subsequent | 1       | 100 ng/mL                         |
| Poskus, T. 2015 [39]                | Lithuania   | Vilnius, Kaunas, and Klaipeda                                  | 271,396    | Jul 2009–Jul 2012 | 50–74 | Initial    | 3, 6, 9 | 30, 200 and 100 ng/mL             |

|                                  |                |                            |           |                   |       |            |     |                                     |
|----------------------------------|----------------|----------------------------|-----------|-------------------|-------|------------|-----|-------------------------------------|
| Remes-Troche, J. M. 2020 [40]    | Mexico         | Veracruz                   | 502       | May 2015–Jan 2016 | 50–90 | Initial    | 1   | 100 ng/mL                           |
| Rutka, M. 2020 [41]              | Hungary        | Csongrád county            | 22,130    | Jul 2013–Jul 2015 | 50–70 | Initial    | 2   | 100 ng/mL                           |
| Salimzadeh, H. 2017 [42]         | Iran           | Tehran                     | 1542      | -                 | 45–75 | Initial    | 1   | 100 ng/mL                           |
| Shahidi, N. 2016 [43]            | Canada         | British Colombia           | 168,599   | Nov 2013–Dec 2014 | 50–74 | Subsequent | 1   | 50 ng/mL                            |
| Shim, J. I. 2010 [44]            | Korea          | -                          | 4,640,365 | 2008              | 50-   | Subsequent | -   | -                                   |
| Steele, R. J. 2013 [45]          | UK             | Scotland                   | 66,225    | Jul 2010–Jan 2011 | 50–74 | Subsequent | 1   | 400 ng/mL                           |
| Stegeman, I. 2015 [46]           | Netherlands    | Amsterdam                  | 3566      | Jul 2011–Jan 2012 | 50–75 | Subsequent | 1   | 50 ng/mL                            |
| Suchanek, S. 2014 [47]           | Czech Republic | -                          | 935,729   | 2009–2011         | 50-   | Subsequent | -   | -                                   |
| Sultanian, R. 2020 [48]          | Canada         | Edmonton, Alberta          | 2167      | Jan–Dec 2014      | 50–75 | Subsequent | 1   | 375 ng/mL                           |
| Teixeira, C. R. 2017 [49]        | Brazil         | Southern                   | 1039      | Apr 2015–Jan 2016 | 50–75 | Initial    | -   | 50 ng/mL                            |
| Telford, J. 2016 [50]            | Canada         | British Columbia           | 19,684    | 2009–2013         | 50–74 | Initial    | 2   | 100 ng/mL                           |
| Tepeš, B. 2014 [51]              | Slovenia       | Ljubljana, Kranj and Celje | 9091      | Jun–Dec 2008      | 64–68 | Initial    | 2   | 100 ng/mL                           |
| Tepeš, B. 2017 [52]              | Slovenia       | -                          | 536,709   | Apr 2009–Mar 2011 | 50–69 | Initial    | 2   | 100 ng/mL                           |
| Triantafyllidis, J. K. 2010 [53] | Greece         | Athens, Salonika, Iraklion | 11,089    | 2008–2009         | 55–72 | Total      | -   | 50 ng/mL or higher or 6 µg/g feces. |
| Vitellius, C. 2019 [54]          | France         | Maine-et-Loire             | 203,117   | Jun 2015–Dec 2016 | 50–74 | Subsequent | -   | 150 ng/mL                           |
| Zorzi, M. 2006 [55]              | Italy          | -                          | 331,333   | 2004              | 50–69 | Subsequent | 1   | -                                   |
| Zorzi, M. 2007 [56]              | Italy          | -                          | 827,473   | 2005              | 50–69 | Subsequent | 1   | 100 ng/mL                           |
| Zorzi, M. 2008 [57]              | Italy          | -                          | 2,106,916 | 2006              | 50–69 | Subsequent | 1   | 100 ng/mL                           |
| Zorzi, M. 2009 [58]              | Italy          | -                          | 2,584,833 | 2007              | 50–69 | Subsequent | 1   | 80,100 ng/mL                        |
| Zorzi, M. 2010 [59]              | Italy          | -                          | 2,593,411 | 2008              | 50–69 | Subsequent | 1   | 100 ng/mL                           |
| Zorzi, M. 2011 [60]              | Italy          | -                          | 2,952,892 | 2009              | 50–69 | Subsequent | 1   | 100 ng/mL                           |
| Zorzi, M. 2015_1 [61]            | Italy          | -                          | 7,744,295 | 2011–2012         | 50–69 | Subsequent | 1   | 80,100 ng/mL                        |
| Zorzi, M. 2015_2 [62]            | Italy          | -                          | 75,596    | 2010              | 50–69 | Subsequent | 1   | 100 ng/mL                           |
| Zorzi, M. 2018 [63]              | Italy          | Veneto                     | 178,828   | 2002–2015         | 50–69 | Subsequent | 1   | 100 ng/mL                           |
| <b>Reports</b>                   |                |                            |           |                   |       |            |     |                                     |
| Australia. 2008 [64]             | Australia      | -                          | 1,010,073 | Aug 2006–Jun 2008 | 55–74 | Total      | 2   | -                                   |
| Australia. 2012 [65]             | Australia      | -                          | 2,097,520 | Jul 2008–Jun 2011 | 50–65 | Subsequent | 2   | -                                   |
| Australia. 2013 [66]             | Australia      | -                          | 929,433   | Jul 2011–Jun 2012 | 50–65 | Subsequent | 2   | -                                   |
| Australia. 2014 [67]             | Australia      | -                          | 963,518   | Jul 2012–Jun 2013 | 49–67 | Subsequent | 2   | -                                   |
| Australia. 2015 [68]             | Australia      | -                          | 1,415,555 | Jul 2013–Jun 2014 | 49–67 | Subsequent | 2   | -                                   |
| Australia. 2017 [69]             | Australia      | -                          | 2,608,599 | 2014–2015         | 50–74 | Subsequent | 2   | -                                   |
| Australia. 2019 [70]             | Australia      | -                          | 4,100,498 | 2016–2017         | 50–74 | Subsequent | 2   | -                                   |
| Australia. 2020 [71]             | Australia      | -                          | 5,074,980 | 2018              | 50–74 | Subsequent | 2   | -                                   |
| Canada. 2013 [72]                | Canada         | -                          | -         | Jan 2009–Dec 2011 | 50–74 | -          | 1+2 | 100 ng/mL                           |
| Canada. 2014 [73]                | Canada         | -                          | -         | 2011–2012         | 50–74 | -          | -   | 100, 300 ng/mL                      |

|                        |             |               |           |                   |       |            |     |               |
|------------------------|-------------|---------------|-----------|-------------------|-------|------------|-----|---------------|
| Canada. 2017 [74]      | Canada      | -             | -         | Jan 2013–Dec 2014 | 50–74 | -          | 1+2 | 50, 100 ng/mL |
| Hong Kong. 2019 [75]   | China       | Hong Kong     | 159,000   | Sep 2016–Sep 2019 | 56–75 | Total      | -   | 100 ng/mL     |
| Ireland. 2016 [76]     | Ireland     | -             | 488,628   | 2012–2015         | 55–74 | Initial    | -   | 100 ng/mL     |
| Ireland. 2019 [77]     | Ireland     | -             | 437,001   | 2016–2017         | 60–69 | Subsequent | -   | -             |
| Netherlands. 2015 [78] | Netherlands | -             | 189,610   | 2014              | 55–75 | Initial    | 1   | 88, 275 ng/mL |
| Netherlands. 2016 [79] | Netherlands | -             | 1,169,391 | 2015              | 55–75 | Subsequent | 1   | 275 ng/mL     |
| Netherlands. 2017 [80] | Netherlands | -             | 1,457,976 | 2016              | 55–75 | Subsequent | 1   | 275 ng/mL     |
| Netherlands. 2018 [81] | Netherlands | -             | 1,941,121 | 2017              | 55–75 | Subsequent | 1   | 275 ng/mL     |
| Netherlands. 2019 [82] | Netherlands | -             | 2,348,534 | 2018              | 55–75 | Subsequent | 1   | 275 ng/mL     |
| New Zealand. 2017 [83] | New Zealand | -             | 121,567   | Jan 2012–Dec 2015 | 50–74 | Total      | -   | -             |
| UK. 2014 [84]          | UK          | North Ireland | -         | Apr 2010–Mar 2013 | 60–71 | Total      | -   | -             |
| UK. 2019 [85]          | UK          | Scotland      | 1,866,332 | Nov 2017–Oct 2018 | 50–74 | Subsequent | -   | -             |

\* The cut-off of 100 ng hemoglobin per mL of buffer solution was corresponding to 20 µg hemoglobin/g feces. FIT: fecal immunochemical tests.

**Table S3.** The Appraisal of cross-sectional studies (AXIS) of included manuscripts.

| Included Manuscripts                | 1 | 2 | 3 | 4 | 5 | 6 | 7 | 10 | 11 | 12 | 13 | 14 | 15 | 16 | 17 | 18 | 19 | 20 |
|-------------------------------------|---|---|---|---|---|---|---|----|----|----|----|----|----|----|----|----|----|----|
| Abu Hassan, M. R. 2016 [1]          | 1 | 1 | 0 | 1 | 0 | 1 | 0 | 0  | 0  | 1  | 0  | 0  | 1  | 1  | 1  | 1  | 9  | 1  |
| Auge, J. 2014 [2]                   | 1 | 1 | 1 | 1 | 0 | 1 | 0 | 1  | 1  | 0  | 0  | 0  | 1  | 1  | 1  | 1  | 0  | 9  |
| Bankovic Lazarevic, D. 2016 [3]     | 1 | 1 | 1 | 1 | 1 | 1 | 0 | 0  | 1  | 0  | 0  | 0  | 1  | 1  | 1  | 0  | 9  | 9  |
| Binefa, G. 2016 [4]                 | 1 | 1 | 1 | 1 | 1 | 1 | 0 | 1  | 1  | 0  | 0  | 0  | 1  | 1  | 1  | 1  | 0  | 1  |
| Blom, J. 2019 [5]                   | 1 | 1 | 1 | 1 | 1 | 1 | 0 | 1  | 1  | 1  | 0  | 0  | 1  | 1  | 1  | 1  | 0  | 1  |
| Bujanda, L. 2015 [6]                | 1 | 1 | 1 | 1 | 1 | 1 | 0 | 0  | 1  | 1  | 0  | 0  | 1  | 1  | 1  | 1  | 0  | 9  |
| Buron, A. 2017 [7]                  | 1 | 1 | 1 | 1 | 1 | 1 | 1 | 1  | 1  | 1  | 1  | 1  | 1  | 1  | 1  | 1  | 0  | 1  |
| Buttigieg, G. 2018 [8]              | 1 | 1 | 0 | 0 | 0 | 0 | 0 | 0  | 0  | 1  | 0  | 0  | 1  | 1  | 1  | 1  | 9  | 0  |
| Chou, C. K. 2016 [9]                | 1 | 1 | 1 | 1 | 1 | 0 | 0 | 1  | 1  | 1  | 0  | 0  | 1  | 1  | 1  | 1  | 0  | 1  |
| Ciatto, S. 2007 [10]                | 1 | 1 | 1 | 1 | 1 | 1 | 0 | 1  | 1  | 1  | 0  | 0  | 1  | 1  | 1  | 0  | 9  | 9  |
| Clark, G. 2020 [11]                 | 1 | 1 | 1 | 1 | 1 | 1 | 0 | 0  | 1  | 1  | 0  | 0  | 1  | 1  | 1  | 1  | 0  | 1  |
| Crotta, S. 2004 [12]                | 1 | 1 | 0 | 1 | 1 | 0 | 0 | 0  | 0  | 1  | 0  | 0  | 1  | 1  | 1  | 1  | 0  | 1  |
| Denters, M. J. 2012 [13]            | 1 | 1 | 0 | 1 | 1 | 1 | 1 | 0  | 1  | 1  | 0  | 0  | 1  | 1  | 1  | 0  | 0  | 1  |
| Fenocchi, E. 2006 [14]              | 1 | 1 | 0 | 1 | 9 | 1 | 0 | 0  | 1  | 1  | 0  | 0  | 1  | 1  | 1  | 0  | 0  | 1  |
| Grazzini, G. 2000 [15]              | 1 | 1 | 0 | 1 | 1 | 1 | 0 | 0  | 0  | 1  | 0  | 0  | 1  | 1  | 1  | 0  | 0  | 9  |
| Grazzini, G. 2004 [16]              | 1 | 1 | 1 | 1 | 1 | 1 | 1 | 0  | 0  | 0  | 0  | 0  | 1  | 1  | 1  | 1  | 9  | 9  |
| Grazzini, G. 2009 [17]              | 1 | 1 | 0 | 1 | 1 | 1 | 0 | 1  | 1  | 1  | 0  | 0  | 1  | 1  | 1  | 0  | 9  | 1  |
| Guo, F. 2020 [18]                   | 1 | 1 | 1 | 1 | 1 | 1 | 0 | 1  | 1  | 1  | 0  | 0  | 1  | 1  | 1  | 1  | 0  | 1  |
| Hoeck, S. 2019 [19]                 | 1 | 1 | 1 | 1 | 0 | 0 | 0 | 1  | 1  | 1  | 0  | 1  | 1  | 1  | 1  | 1  | 0  | 1  |
| Kapidzic, A. 2015 [20]              | 1 | 1 | 1 | 1 | 1 | 1 | 0 | 1  | 1  | 0  | 0  | 0  | 1  | 1  | 1  | 1  | 0  | 1  |
| Khuhaprema, T. 2014 [21]            | 1 | 1 | 1 | 1 | 1 | 1 | 0 | 0  | 1  | 1  | 0  | 0  | 1  | 1  | 1  | 1  | 0  | 1  |
| Kim, D. H. 2018 [22]                | 1 | 1 | 1 | 1 | 0 | 1 | 0 | 1  | 1  | 1  | 0  | 0  | 1  | 1  | 1  | 1  | 0  | 1  |
| Koivogui, A. 2018 [23]              | 1 | 1 | 1 | 1 | 1 | 1 | 0 | 1  | 1  | 1  | 0  | 0  | 1  | 1  | 1  | 1  | 0  | 1  |
| Launoy, G. D. 2005 [24]             | 1 | 1 | 0 | 1 | 0 | 0 | 0 | 0  | 1  | 1  | 0  | 0  | 1  | 1  | 1  | 1  | 9  | 9  |
| Lund, M. 2019 [25]                  | 1 | 1 | 0 | 1 | 1 | 1 | 0 | 1  | 1  | 0  | 0  | 0  | 1  | 1  | 1  | 1  | 0  | 1  |
| Manzano-Robleda, M. D. C. 2020 [26] | 1 | 1 | 0 | 1 | 1 | 1 | 0 | 0  | 1  | 1  | 1  | 1  | 1  | 1  | 1  | 1  | 0  | 1  |
| McNamara, D. 2011 [27]              | 1 | 1 | 0 | 1 | 1 | 0 | 0 | 0  | 0  | 0  | 0  | 0  | 1  | 1  | 1  | 0  | 9  | 9  |
| Miuţescu, B. 2013 [28]              | 1 | 1 | 0 | 1 | 0 | 1 | 0 | 1  | 1  | 1  | 0  | 0  | 1  | 1  | 1  | 0  | 9  | 1  |
| Moss, S. 2017 [29]                  | 1 | 1 | 1 | 1 | 1 | 0 | 1 | 1  | 1  | 1  | 0  | 1  | 1  | 1  | 1  | 0  | 0  | 9  |
| Nakama, H. 1996 [30]                | 1 | 1 | 0 | 1 | 0 | 0 | 0 | 0  | 0  | 1  | 0  | 0  | 1  | 1  | 1  | 1  | 9  | 9  |
| Nakama, H. 2001 [31]                | 1 | 1 | 0 | 1 | 0 | 0 | 0 | 1  | 1  | 1  | 0  | 0  | 1  | 1  | 1  | 0  | 9  | 9  |
| Njor, S. H. 2018 [32]               | 1 | 1 | 1 | 1 | 1 | 1 | 0 | 0  | 0  | 1  | 0  | 0  | 1  | 1  | 1  | 1  | 0  | 9  |

|                                  |   |   |   |   |   |   |   |   |   |   |   |   |   |   |   |   |   |   |
|----------------------------------|---|---|---|---|---|---|---|---|---|---|---|---|---|---|---|---|---|---|
| Okada, T. 2019 [33]              | 1 | 1 | 0 | 1 | 1 | 1 | 0 | 1 | 1 | 1 | 0 | 0 | 1 | 1 | 1 | 1 | 0 | 1 |
| Parente, F. 2013 [34]            | 1 | 1 | 1 | 1 | 1 | 1 | 1 | 1 | 1 | 0 | 0 | 0 | 1 | 1 | 1 | 0 | 0 | 9 |
| Park, M. J. 2011 [35]            | 1 | 1 | 1 | 1 | 9 | 9 | 0 | 0 | 0 | 1 | 0 | 0 | 1 | 1 | 1 | 0 | 9 | 9 |
| Pellat, A. 2018 [36]             | 1 | 1 | 1 | 1 | 1 | 1 | 1 | 0 | 0 | 0 | 0 | 0 | 1 | 1 | 1 | 1 | 0 | 1 |
| Piette, C. 2017 [37]             | 1 | 1 | 1 | 1 | 1 | 1 | 1 | 0 | 0 | 1 | 0 | 0 | 1 | 1 | 1 | 0 | 0 | 9 |
| Portillo, I. 2018 [38]           | 1 | 1 | 1 | 1 | 9 | 1 | 0 | 1 | 1 | 1 | 0 | 0 | 1 | 1 | 1 | 1 | 0 | 1 |
| Poskus, T. 2015 [39]             | 1 | 1 | 1 | 1 | 1 | 9 | 0 | 0 | 0 | 0 | 0 | 0 | 1 | 1 | 1 | 1 | 0 | 9 |
| Remes-Troche, J. M. 2020 [40]    | 1 | 1 | 0 | 1 | 0 | 1 | 0 | 0 | 1 | 1 | 0 | 0 | 1 | 1 | 1 | 1 | 0 | 1 |
| Rutka, M. 2020 [41]              | 1 | 1 | 0 | 1 | 1 | 1 | 0 | 1 | 1 | 0 | 0 | 0 | 1 | 1 | 1 | 1 | 0 | 1 |
| Salimzadeh, H. 2017 [42]         | 1 | 1 | 0 | 1 | 1 | 1 | 0 | 1 | 1 | 1 | 0 | 0 | 1 | 1 | 1 | 1 | 0 | 1 |
| Shahidi, N. 2016 [43]            | 1 | 1 | 1 | 1 | 9 | 1 | 0 | 1 | 1 | 0 | 0 | 0 | 1 | 1 | 1 | 1 | 0 | 1 |
| Shim, J. I. 2010 [44]            | 1 | 1 | 1 | 1 | 9 | 9 | 0 | 1 | 1 | 1 | 0 | 0 | 1 | 1 | 1 | 1 | 0 | 9 |
| Steele, R. J. 2013 [45]          | 1 | 1 | 1 | 1 | 1 | 9 | 0 | 1 | 1 | 0 | 0 | 0 | 1 | 1 | 1 | 0 | 0 | 1 |
| Stegeman, I. 2015 [46]           | 1 | 1 | 0 | 1 | 1 | 1 | 1 | 0 | 1 | 0 | 0 | 0 | 1 | 1 | 1 | 1 | 0 | 9 |
| Suchanek, S. 2014 [47]           | 1 | 1 | 1 | 1 | 9 | 9 | 0 | 0 | 1 | 0 | 0 | 0 | 1 | 1 | 1 | 1 | 0 | 9 |
| Sultanian, R. 2020 [48]          | 1 | 1 | 0 | 1 | 1 | 1 | 0 | 1 | 1 | 1 | 0 | 0 | 1 | 1 | 1 | 1 | 0 | 1 |
| Teixeira, C. R. 2017 [49]        | 1 | 1 | 0 | 1 | 9 | 0 | 0 | 0 | 0 | 1 | 0 | 0 | 1 | 1 | 1 | 1 | 9 | 1 |
| Telford, J. 2016 [50]            | 1 | 1 | 0 | 1 | 1 | 1 | 0 | 0 | 0 | 1 | 0 | 0 | 1 | 1 | 1 | 1 | 0 | 1 |
| Tepeš, B. 2014 [51]              | 1 | 1 | 0 | 1 | 1 | 1 | 0 | 1 | 1 | 0 | 0 | 0 | 1 | 1 | 1 | 0 | 0 | 9 |
| Tepeš, B. 2017 [52]              | 1 | 1 | 1 | 1 | 1 | 1 | 0 | 1 | 1 | 1 | 0 | 0 | 1 | 1 | 1 | 1 | 0 | 9 |
| Triantafillidis, J. K. 2010 [53] | 1 | 1 | 0 | 1 | 1 | 0 | 0 | 0 | 0 | 0 | 0 | 0 | 1 | 1 | 1 | 0 | 9 | 9 |
| Vitellius, C. 2019 [54]          | 1 | 1 | 1 | 1 | 1 | 0 | 0 | 1 | 1 | 0 | 0 | 0 | 1 | 1 | 1 | 1 | 9 | 9 |
| Zorzi, M. 2006 [55]              | 1 | 1 | 1 | 1 | 1 | 0 | 1 | 0 | 0 | 0 | 0 | 0 | 1 | 1 | 0 | 0 | 9 | 9 |
| Zorzi, M. 2007 [56]              | 1 | 1 | 1 | 1 | 1 | 0 | 1 | 0 | 0 | 0 | 0 | 0 | 1 | 1 | 0 | 0 | 9 | 9 |
| Zorzi, M. 2008 [57]              | 1 | 1 | 1 | 1 | 1 | 0 | 1 | 0 | 0 | 0 | 0 | 0 | 1 | 1 | 0 | 0 | 9 | 9 |
| Zorzi, M. 2009 [58]              | 1 | 1 | 1 | 1 | 1 | 0 | 1 | 0 | 0 | 0 | 0 | 0 | 1 | 1 | 0 | 0 | 9 | 9 |
| Zorzi, M. 2010 [59]              | 1 | 1 | 1 | 1 | 1 | 0 | 1 | 0 | 0 | 0 | 0 | 0 | 1 | 1 | 0 | 0 | 9 | 9 |
| Zorzi, M. 2011 [60]              | 1 | 1 | 1 | 1 | 1 | 0 | 1 | 0 | 0 | 0 | 0 | 0 | 1 | 1 | 0 | 0 | 9 | 9 |
| Zorzi, M. 2015_1 [61]            | 1 | 1 | 1 | 1 | 1 | 0 | 1 | 0 | 0 | 0 | 0 | 0 | 1 | 1 | 0 | 0 | 9 | 9 |
| Zorzi, M. 2015_2 [62]            | 1 | 1 | 1 | 1 | 0 | 0 | 0 | 1 | 1 | 1 | 0 | 0 | 1 | 1 | 1 | 1 | 0 | 1 |
| Zorzi, M. 2018 [63]              | 1 | 1 | 1 | 1 | 1 | 0 | 1 | 1 | 1 | 1 | 0 | 0 | 1 | 1 | 1 | 1 | 0 | 9 |

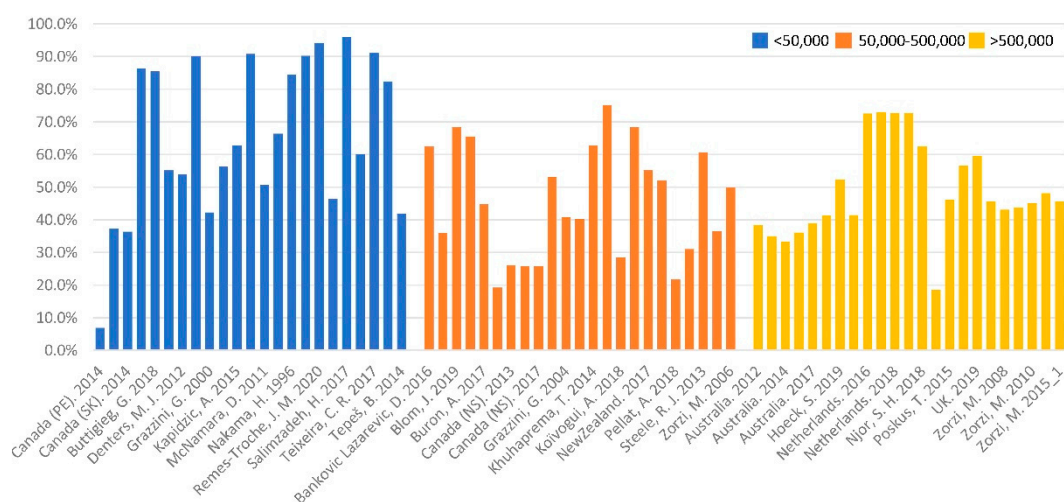

**Figure S1.** Participation rates by sample size.

## Table References

1. Abu Hassan, M.R.; Leong, T.W.; Othman Andu, D.F.; Hat, H.; Nik Mustapha, N.R. Evaluation of a Colorectal Carcinoma Screening Program in Kota Setar and Kuala Muda Districts, Malaysia. *Asian Pac. J. Cancer Prev.* **2016**, *17*, 569–573.
2. Auge, J.M.; Pellise, M.; Escudero, J.M.; Hernandez, C.; Andreu, M.; Grau, J.; Buron, A.; López-Cerón, M.; Bessa, X.; Serradesanferm, A.; et al. Risk stratification for advanced colorectal neoplasia according to fecal hemoglobin concentration in a colorectal cancer screening program. *Gastroenterology* **2014**, *147*, 628–636.e1, doi:10.1053/j.gastro.2014.06.008.

3. Bankovic Lazarevic, D.; Krivokapic, Z.; Barisic, G.; Jovanovic, V.; Ilic, D.; Veljkovic, M. Organized colorectal cancer screening in Serbia - the first round within 2013–2014. *Vojnosanit. Pregl.* **2016**, *73*, 360–367.
4. Binefa, G.; Garcia, M.; Milà, N.; Fernández, E.; Rodríguez-Moranta, F.; Gonzalo, N.; Benito, L.; Clopés, A.; Guardiola, J.; Moreno, V. Colorectal Cancer Screening Programme in Spain: Results of Key Performance Indicators After Five Rounds (2000–2012). *Sci. Rep.* **2016**, *6*, 19532, doi:10.1038/srep19532.
5. Blom, J.; Löwbeer, C.; Elfström, K.M.; Sventelius, M.; Öhman, D.; Saraste, D.; Törnberg, S. Gender-specific cut-offs in colorectal cancer screening with FIT: Increased compliance and equal positivity rate. *J. Med. Screen.* **2019**, *26*, 92–97, doi:10.1177/0969141318804843.
6. Bujanda, L.; Sarasqueta, C.; Castells, A.; Pellisé, M.; Cubiella, J.; Gil, I.; Cosme, A.; Arana-Arri, E.; Mar, I.; Idigoras, I.; et al. Colorectal cancer in a second round after a negative faecal immunochemical test. *Eur. J. Gastroenterol. Hepatol.* **2015**, *27*, 813–818, doi:10.1097/MEG.0000000000000366.
7. Buron, A.; Auge, J.M.; Sala, M.; Román, M.; Castells, A.; Macià, F.; Comas, M.; Guiriguat, C.; Bessa, X.; Castells, X. Association between socioeconomic deprivation and colorectal cancer screening outcomes: Low uptake rates among the most and least deprived people. *PLoS One* **2017**, *12*, 1DUMMY, doi:10.1371/journal.pone.0179864.
8. Gabriella Buttigieg; Rachel Abela A Retrospective study on the National Colorectal Screening Programme: Analysis of participation and findings. *THESYNAPSE.net* **2018**, *17*, 6–8.
9. Chou, C.K.; Chen, S.L.S.; Yen, A.M.F.; Chiu, S.Y.H.; Fann, J.C.Y.; Chiu, H.M.; Chuang, S.L.; Chiang, T.H.; Wu, M.S.; Wu, C.Y.; et al. Outreach and inreach organized service screening programs for colorectal cancer. *PLoS One* **2016**, *11*, doi:10.1371/journal.pone.0155276.
10. Ciatto, S.; Martinelli, F.; Castiglione, G.; Mantellini, P.; Rubeca, T.; Grazzini, G.; Bonanomi, A.G.; Confortini, M.; Zappa, M. Association of FOBT-assessed faecal Hb content with colonic lesions detected in the Florence screening programme. *Br. J. Cancer* **2007**, *96*, 218–221, doi:10.1038/sj.bjc.6603534.
11. Clark, G.; Strachan, J.A.; Carey, F.A.; Godfrey, T.; Irvine, A.; McPherson, A.; Brand, J.; Anderson, A.S.; Fraser, C.G.; Steele, R.J.C. Transition to quantitative faecal immunochemical testing from guaiac faecal occult blood testing in a fully rolled-out population-based national bowel screening programme. *Gut* **2020**, doi:10.1136/gutjnl-2019-320297.
12. Crotta, S.; Castiglione, G.; Grazzini, G.; Valle, F.; Mosconi, S.; Rosset, R. Feasibility study of colorectal cancer screening by immunochemical faecal occult blood testing: Results in a northern Italian community. *Eur. J. Gastroenterol. Hepatol.* **2004**, *16*, 33–37, doi:10.1097/00042737-200401000-00006.
13. Denters, M.J.; Deutekom, M.; Bossuyt, P.M.; van Rijn, A.F.; Fockens, P.; Dekker, E. Involvement of previous non-participants cannot fully compensate for lower participation in a second round of FIT-screening. *Cancer Epidemiol.* **2013**, *37*, 330–335, doi:10.1016/j.canep.2013.01.007.
14. Fenocchi, E.; Martínez, L.; Tolve, J.; Montano, D.; Rondán, M.; Parra-Blanco, A.; Eishi, Y. Screening for colorectal cancer in Uruguay with an immunochemical faecal occult blood test. *Eur. J. Cancer Prev.* **2006**, *15*, 384–390, doi:10.1097/00008469-200610000-00002.
15. Grazzini, G.; Castiglione, G.; Isu, A.; Mantellini, P.; Rubeca, T.; Sani, C.; Turco, P.; Zappa, M. Colorectal cancer screening by fecal occult blood testing: Results of a population-based experience. *Tumori* **2000**, *86*, 384–388.
16. Grazzini, G.; Castiglione, G.; Ciabattini, C.; Franceschini, F.; Giorgi, D.; Gozzi, S.; Mantellini, P.; Lopane, P.; Perco, M.; Rubeca, T.; et al. Colorectal cancer screening programme by faecal occult blood test in Tuscany: First round results. *Eur. J. Cancer Prev.* **2004**, *13*, 19–26, doi:10.1097/00008469-200402000-00004.
17. Grazzini, G.; Visioli, C.B.; Zorzi, M.; Ciatto, S.; Banovich, F.; Bonanomi, A.G.; Bortoli, A.; Castiglione, G.; Cazzola, L.; Confortini, M.; et al. Immunochemical faecal occult blood test: Number of samples and positivity cutoff. What is the best strategy for colorectal cancer screening? *Br. J. Cancer* **2009**, *100*, 259–265, doi:10.1038/sj.bjc.6604864.
18. Guo, F.; De Brabander, I.; Francart, J.; Candeur, M.; Polus, M.; Van Eycken, L.; Brenner, H. Benefits of switching from guaiac-based faecal occult blood to faecal immunochemical testing: experience from the Wallonia-Brussels colorectal cancer screening programme. *Br. J. Cancer* **2020**, *122*, 1109–1117, doi:10.1038/s41416-020-0754-5.
19. Hoeck, S.; van de Veerdonk, W.; De Brabander, I.; Kellen, E. Does the Flemish colorectal cancer screening programme reach equity in FIT uptake? *Eur J Public Heal.* **2019**, doi:10.1093/eurpub/ckz043.
20. Kapidzic, A.; van der Meulen, M.P.; Hol, L.; van Roon, A.H.C.; Looman, C.W.N.; Lansdorp-Vogelaar, I.; van Ballegooijen, M.; van Vuuren, A.J.; Reijerink, J.C.I.Y.; van Leerdam, M.E.; et al. Gender Differences in Fecal Immunochemical Test Performance for Early Detection of Colorectal Neoplasia. *Clin. Gastroenterol. Hepatol.* **2015**, *13*, 1464–1471.e4, doi:10.1016/j.cgh.2015.02.023.
21. Kluhuprema, T.; Sangrajang, S.; Lalitwongsa, S.; Chokvanitphong, V.; Raunroadroong, T.; Ratanachu-Ek, T.; Muwong, R.; Lucas, E.; Wild, C.; Sankaranarayanan, R. Organised colorectal cancer screening in Lampang Province, Thailand: preliminary results from a pilot implementation programme. *BMJ Open* **2014**, *4*, doi:10.1136/bmjopen-2013-003671.
22. Kim, D.H.; Cha, J.M.; Kwak, M.S.; Yoon, J.Y.; Cho, Y.H.; Jeon, J.W.; Shin, H.P.; Joo, K.R.; Lee, J.I. Quality Metrics of a Fecal Immunochemical Test-Based Colorectal Cancer Screening Program in Korea. *Gut Liver* **2018**, *12*, 183–189, doi:10.5009/gnl17030.
23. Koivogui, A.; Le Mab, G.; Benamouzig, R. Detection of colorectal neoplasia in a cohort before and after the change of fecal occult blood test in a French colorectal cancer screening program. *Am. J. Gastroenterol.* **2018**, *113*, 1891–1899, doi:10.1038/s41395-018-0367-2.
24. Launoy, G.D.; Bertrand, H.J.; Berchi, C.; Talbourdet, V.Y.; Guizard, A.V.N.; Bouvier, V.M.; Caces, E.R. Evaluation of an immunochemical fecal occult blood test with automated reading in screening for colorectal cancer in a general average-risk population. *Int. J. Cancer* **2005**, *115*, 493–496, doi:10.1002/ijc.20921.
25. Lund, M.; Erichsen, R.; Valori, R.; Møller Jensen, T.; Helle Njor, S.; Laurberg, S.; Andersen, B. Data quality and colonoscopy performance indicators in the prevalent round of a FIT-based colorectal cancer screening program. *Scand. J. Gastroenterol.* **2019**, doi:10.1080/00365521.2019.1597158.
26. Manzano-Robleda, M.D.C.; Espinosa-Tamez, P.; Potter, M.B.; Lajous, M.; Van Loon, K.; Zhang, L.; Jimenez-Peña, A.; Sanchez Del Monte, J.; Mohar-Betancourt, A.; Hernández-Guerrero, A. Fecal immunological test results and diagnostic colonoscopy in a Mexican population at average risk for colorectal cancer. *Cancer Prev. Res. (Phila.)* **2020**, doi:10.1158/1940-6207.CAPR-20-0076.
27. McNamara, D.; Qasim, A.; Lee, N.; Condon, C.; O'Morain, C. Round one of the Adelaide and Meath Hospital/Trinity College Colorectal Cancer Screening Programme: Programme report and analysis based on established international key performance indices. *Ir. J. Med. Sci.* **2011**, *180*, 549–552, doi:10.1007/s11845-010-0650-8.
28. Miutescu, B.; Sporea, I.; Popescu, A.; Bota, S.; Iovănescu, D.; Burlea, A.; Mos, L.; Palaghia, M.; Vasilescu, A.; Miutescu, E. Effectiveness of

- the immunochemical fecal test (FIT) for detection of advanced adenomas in colorectal carcinoma screening in an asymptomatic population. *Rev. medico-chirurgicală a Soc. Medici și Nat. din Iași* **2013**, *117*, 302–307.
29. Moss, S.; Mathews, C.; Day, T.J.; Smith, S.; Seaman, H.E.; Snowball, J.; Halloran, S.P. Increased uptake and improved outcomes of bowel cancer screening with a faecal immunochemical test: Results from a pilot study within the national screening programme in England. *Gut* **2017**, *66*, 1631–1644, doi:10.1136/gutjnl-2015-310691.
  30. Nakama, H.; Kamijo, N.; Abdul Fattah, A.S.; Zhang, B. Validity of immunological faecal occult blood screening for colorectal cancer: a follow up study. *J. Med. Screen.* **1996**, *3*, 63–65.
  31. Nakama, H.; Zhang, B.; Fukazawa, K.; Zhang, X. Comparisons of cancer detection rate and costs of one cancer detected among different age-cohorts in immunochemical occult blood screening. *J. Cancer Res. Clin. Oncol.* **2001**, *127*, 439–443.
  32. Njor, S.H.; Friis-Hansen, L.; Andersen, B.; Søndergaard, B.; Linnemann, D.; Jørgensen, J.C.R.; Roikjær, O.; Rasmussen, M. Three years of colorectal cancer screening in Denmark. *Cancer Epidemiol.* **2018**, *57*, 39–44, doi:10.1016/j.canep.2018.09.003.
  33. Okada, T.; Odagaki, T.; López-Köstner, F.; Zárate, A.J.; Ponce, A.; Kronberg, U.; Karelovic, S.; Flores, S.; Estela, R.; Ito, T.; et al. Colorectal cancer risk factors in asymptomatic Chilean population: a survey of international collaboration between Japan and Chile. *Eur. J. Cancer Prev.* **2019**, doi:10.1097/CEJ.0000000000000531.
  34. Parente, F.; Boemo, C.; Ardizzoia, A.; Costa, M.; Carzaniga, P.; Ilardo, A.; Moretti, R.; Cremaschini, M.; Parente, E.M.; Pirola, M.E. Outcomes and cost evaluation of the first two rounds of a colorectal cancer screening program based on immunochemical fecal occult blood test in northern Italy. *Endoscopy* **2013**, *45*, 27–34, doi:10.1055/s-0032-1325800.
  35. Park, M.J.; Choi, K.S.; Jun, J.K.; Lee, H.Y. Trends in the National Cancer Screening Program for colorectal cancer in the Republic of Korea, 2004–2009. *Asian Pac. J. Cancer Prev.* **2011**, *12*, 3489–3493.
  36. Pellat, A.; Deyra, J.; Coriat, R.; Chaussade, S. Results of the national organised colorectal cancer screening program with FIT in Paris. *Sci Rep* **2018**, *8*, 4162, doi:10.1038/s41598-018-22481-9.
  37. Piette, C.; Durand, G.; Bretagne, J.F.; Faivre, J. Additional mailing phase for FIT after a medical offer phase: The best way to improve compliance with colorectal cancer screening in France. *Dig. Liver Dis.* **2017**, *49*, 308–311, doi:10.1016/j.dld.2016.09.015.
  38. Portillo, I.; Idigoras, I.; Bilbao, I.; Arana-Arri, E.; Fernández-Landa, M.J.; Hurtado, J.L.; Sarasaqueta, C.; Bujanda, L. Colorectal cancer screening program using FIT: Quality of colonoscopy varies according to hospital type. *Endosc. Int. Open* **2018**, *6*, E1149–E1156, doi:10.1055/a-0655-1987.
  39. Poskus, T.; Strupas, K.; Mikalauskas, S.; Bitinaite, D.; Kavaliauskas, A.; Samalavicius, N.E.; Saladzinskas, Z. Initial results of the National Colorectal Cancer Screening Program in Lithuania. *Eur. J. Cancer Prev.* **2015**, *24*, 76–80, doi:10.1097/CEJ.0000000000000096.
  40. Remes-Troche, J.M.; Hinojosa-Garza, G.; Espinosa-Tamez, P.; Meixueiro-Daza, A.; Grube-Pagola, P.; Van Loon, K.; Potter, M.B.; Lajous, M. Faecal immunochemical test-based colorectal cancer screening in Mexico: an initial experience. *Fam. Pract.* **2020**, *37*, 321–324, doi:10.1093/fampra/cmz078.
  41. Rutka, M.; Bor, R.; Molnár, T.; Farkas, K.; Fábián, A.; Gy Rffy, M.; Bálint, A.; Milassin, Á.; Sz Cs, M.; Tiszlavicz, L.; et al. Efficacy of a population-based colorectal cancer screening pilot. *Turk J Med Sci* **2020**, *50*, 756–763, doi:10.3906/sag-1908-79.
  42. Salimzadeh, H.; Bishehsari, F.; Sauvaget, C.; Amani, M.; Hamzehloo, G.; Nikfarjam, A.; Merat, S.; Delavari, A.; Malekzadeh, R. Feasibility of colon cancer screening by fecal immunochemical test in Iran. *Arch. Iran. Med.* **2017**, *20*, 726–733.
  43. Shahidi, N.; Gentile, L.; Gondara, L.; Hamm, J.; McGahan, C.E.; Enns, R.; Telford, J. Correlating Quantitative Fecal Immunochemical Test Results with Neoplastic Findings on Colonoscopy in a Population-Based Colorectal Cancer Screening Program: A Prospective Study. *Can. J. Gastroenterol. Hepatol.* **2016**, *2016*, doi:10.1155/2016/4650471.
  44. Shim, J.I.; Kim, Y.; Han, M.A.; Lee, H.Y.; Choi, K.S.; Jun, J.K.; Park, E.C. Results of colorectal cancer screening of the national cancer screening program in Korea, 2008. *Cancer Res Treat* **2010**, *42*, 191–198, doi:10.4143/crt.2010.42.4.191.
  45. Steele, R.J.; McDonald, P.J.; Digby, J.; Brownlee, L.; Strachan, J.A.; Libby, G.; McClements, P.L.; Birrell, J.; Carey, F.A.; Diamant, R.H.; et al. Clinical outcomes using a faecal immunochemical test for haemoglobin as a first-line test in a national programme constrained by colonoscopy capacity. *United Eur. Gastroenterol. J.* **2013**, *1*, 198–205, doi:10.1177/2050640613489281.
  46. Stegeman, I.; van Doorn, S.C.; Mundt, M.W.; Mallant-Hent, R.C.; Bongers, E.; Elferink, M.A.G.; Fockens, P.; Stroobants, A.K.; Bossuyt, P.M.; Dekker, E. Participation, yield, and interval carcinomas in three rounds of biennial FIT-based colorectal cancer screening. *Cancer Epidemiol.* **2015**, *39*, 388–393, doi:10.1016/j.canep.2015.03.012.
  47. Suchanek, S.; Majek, O.; Vojtechova, G.; Minarikova, P.; Rotnaglova, B.; Seifert, B.; Minarik, M.; Kozeny, P.; Dusek, L.; Zavoral, M. Colorectal cancer prevention in the Czech Republic: Time trends in performance indicators and current situation after 10 years of screening. *Eur. J. Cancer Prev.* **2014**, *23*, 18–26, doi:10.1097/CEJ.0b013e328364f203.
  48. Sultanian, R.; Du, L.; Moysey, B.; Morse, A.; Veldhuyzen van Zanten, S.; Montano-Loza, A.J. The Impact of Transitioning From Guaiac-Fecal Occult Blood Testing to Fecal Immunochemical Testing in a Canadian Colon Cancer Screening Program. *J Can Assoc Gastroenterol* **2020**, *3*, 177–184, doi:10.1093/jcag/gwz009.
  49. Teixeira, C.R.; Bonotto, M.L.; Lima, J.P.; Figueiredo, L.F.; Conrado, L.; Frasca, C. Clinical impact of the immunochemical fecal occult blood test for colorectal cancer screening in Brazil. *Ann. Gastroenterol.* **2017**, *30*, 442–445, doi:10.20524/aog.2017.0151.
  50. Telford, J.; Gentile, L.; Gondara, L.; McGahan, C.; Coldman, A. Performance of a quantitative fecal immunochemical test in a colorectal cancer screening pilot program: a prospective cohort study. *C. Open* **2016**, *4*, E668–e673, doi:10.9778/cmajo.20160047.
  51. Tepeš, B.; Štabuc, B.; Stefanovič, M.; Bračko, M.; Frkovič Grazio, S.; Novak Mlakar, D.; Maučec Zakotnik, J. Faecal immunochemical test-based colorectal cancer screening programme SVIT in Slovenia: Pilot phase. *Eur. J. Cancer Prev.* **2014**, *23*, 235–239, doi:10.1097/CEJ.0b013e3283651c9e.
  52. Tepeš, B.; Bracko, M.; Novak Mlakar, D.; Stefanovic, M.; Stabuc, B.; Frkovic Grazio, S.; Maucec Zakotnik, J. Results of the FIT-based National Colorectal Cancer Screening Program in Slovenia. *J. Clin. Gastroenterol.* **2017**, *51*, e52–e59, doi:10.1097/MCG.0000000000000662.
  53. Triantafillidis, J.K.; Kosmidis, P.A.; Papalois, A.; Merikas, E.; Cheracakis, P.; Govosdis, V.; Nicolakis, D.; Panteris, V.; Skourta, I.; Tountas, I.; et al. Screening programs for colorectal cancer in Greece: Results of two pilot studies conducted in March 2008 and 2009. *Ann. Gastroenterol.* **2010**, *23*, 42–47.
  54. Vitellius, C.; Laly, M.; Banaszuk, A.S.; Deherce, I.; Cornet, N.; Bertrais, S.; Saulnier, P.; Caroli-Bosc, F.X. Contribution of the OC Sensor® immunoassay in comparison to the Hemoccult II® guaiac-test in organized colorectal cancer screening. *Eur. J. Epidemiol.* **2019**, *34*, 163–172,

doi:10.1007/s10654-018-0471-z.

55. Zorzi, M.; Grazzini, G.; Senore, C.; Vettorazzi, M. Screening for colorectal cancer in Italy: 2004 survey. *Epidemiol. Prev.* **2006**, *30*, 41–50.
56. Zorzi, M.; Barca, A.; Falcini, F.; Grazzini, G.; Pizzuti, R.; Ravaioli, A.; Sassoli de Bianchi, P.; Senore, C.; Sigillito, A.; Vettorazzi, M.; et al. Screening for colorectal cancer in Italy: 2005 survey. *Epidemiol. Prev.* **2007**, *31*, 49–60.
57. Zorzi, M.; Falcini, F.; Fedato, C.; Grazzini, G.; de' Bianchi, P.S.; Senore, C.; Vettorazzi, M.; Visioli, C.; Zappa, M. Screening for colorectal cancer in Italy: 2006 survey. *Epidemiol. Prev.* **2008**, *32*, 55–68.
58. Zorzi, M.; Fedato, C.; Naldoni, C.; Sassatelli, R.; Sassoli De' Bianchi, P.; Senore, C.; Visioli, C.B.; Cogo, C. Screening for colorectal cancer in Italy: 2007 survey. *Epidemiol. Prev.* **2009**, *33 Suppl 2*, 57–74.
59. Zorzi, M.; Baracco, S.; Fedato, C.; Grazzini, G.; Naldoni, C.; Sassoli de' Bianchi, P.; Senore, C.; Visioli, C.B.; Cogo, C. Screening for colorectal cancer in Italy: 2008 survey. *Epidemiol. Prev.* **2010**, *34*, 53–72.
60. Zorzi, M.; Baracco, S.; Fedato, C.; Grazzini, G.; Sassoli De' Bianchi, P.; Senore, C.; Visioli, C.B.; Cogo, C. Screening for colorectal cancer in Italy, 2009 survey. *Epidemiol. Prev.* **2011**, *35*, 55–77.
61. Zorzi, M.; Da Re, F.; Mantellini, P.; Naldoni, C.; Sassoli De' Bianchi, P.; Senore, C.; Turrin, A.; Visioli, C.B.; Zappa, M. Screening for colorectal cancer in Italy: 2011–2012 survey. *Epidemiol. Prev.* **2015**, *39*, 93–107.
62. Zorzi, M.; Senore, C.; Da Re, F.; Barca, A.; Bonelli, L.A.; Cannizzaro, R.; Fasoli, R.; Furia, L.D.; Giulio, E.D.; Mantellini, P.; et al. Quality of colonoscopy in an organised colorectal cancer screening programme with immunochemical faecal occult blood test: The EQuIPE study (Evaluating Quality Indicators of the Performance of Endoscopy). *Gut* **2015**, *64*, 1389–1396, doi:10.1136/gutjnl-2014-307954.
63. Zorzi, M.; Hassan, C.; Capodaglio, G.; Fedato, C.; Montaguti, A.; Turrin, A.; Rosano, A.; Monetti, D.; Stocco, C.; Baracco, S.; et al. Long-term performance of colorectal cancer screening programmes based on the faecal immunochemical test. *Gut* **2018**, *67*, 2124–2130, doi:10.1136/gutjnl-2017-314753.
64. Australian Institute of Health and Welfare and the Australian Government Department of Health and Ageing for the National Bowel Cancer Screening Program *National Bowel Cancer Screening Program Monitoring report 2006 - 2008*; Canberra, 2008;
65. Australian Institute of Health and Welfare and the Australian Government Department of Health and Ageing for the National Bowel Cancer Screening Program *National Bowel Cancer Screening Program Monitoring report 2008 - 2011*; Canberra, 2012;
66. Australian Institute of Health and Welfare *National Bowel Cancer Screening Program Monitoring report 2011–12*; Canberra, 2013;
67. Australian Institute of Health and Welfare *National Bowel Cancer Screening Program Monitoring report 2012–13*; Canberra, 2014;
68. Australian Institute of Health and Welfare *National Bowel Cancer Screening Program Monitoring report 2013–14*; Canberra, 2015;
69. Australian Institute of Health and Welfare *National Bowel Cancer Screening Program Monitoring report 2017*; Canberra, 2017;
70. Australian Institute of Health and Welfare *National Bowel Cancer Screening Program Monitoring report 2019*; Canberra, 2019;
71. Australian Institute of Health and Welfare *National Bowel Cancer Screening Program Monitoring report 2020*; Canberra, 2020;
72. Canadian Partnership Against Cancer *Colorectal Cancer Screening in Canada: Program Performance Results Report, January 2009 – December 2011*; Toronto, 2013;
73. Canadian Partnership Against Cancer *Colorectal Cancer Screening in Canada: Monitoring & Evaluation of Quality Indicators – Results Report, January 2011 – December 2012*; Toronto, 2014;
74. Canadian Partnership Against Cancer *Colorectal Cancer Screening in Canada: Monitoring & Evaluation of Quality Indicators – Results Report, January 2013 – December 2014*; Toronto, 2017;
75. Non-Communicable Disease Branch, C. for H.P.D. of H.H.K.S.A.R.G. *Colorectal Cancer Screening Programme-Progress report of the screening outcome for participant enrolled between 28 September 2016 and 27 September 2019*; Hong Kong, 2019;
76. Cuid d'Fheidhmeannacht na Seirbhíse Sláinte. Part of the Health Service Executive (Ireland) *BowelScreen Programme Report Round One 2012–2015*; dublin, 2016;
77. Cuid d'Fheidhmeannacht na Seirbhíse Sláinte. Part of the Health Service Executive (Ireland) *BowelScreen Programme Report Round Two 2016–2017*; Dublin, 2019;
78. Nederlands kanker Instit; *Uut Monitoring and Evaluation of the Colorectal Cancer Screening Programme 2014; 2015*;
79. Nederlands kanker Instituut *Monitoring and Evaluation of the Colorectal Cancer Screening Programme 2015; 2016*;
80. Nederlands kanker Instituut *Monitoring and Evaluation of the Colorectal Cancer Screening Programme 2016; 2017*;
81. Nederlands kanker Instituut *Monitoring and Evaluation of the Colorectal Cancer Screening Programme 2017; 2018*;
82. National Institute for Public Health and the Environment (RIVM) *Monitoring and Evaluation of the Colorectal Cancer Screening Programme 2018; 2019*;
83. Ministry of Health (New Zealand) *Final Evaluation Report of the Bowel Screening Pilot Screening Rounds One and Two*; Wellington, 2016;
84. Quality Assurance Reference Centre, N.I.C.S.P.P.H.A. *Northern Ireland Bowel Cancer Screening Programme Inaugural Report*; BELFAST, 2014;
85. Information Services Division *Scottish Bowel Screening Programme Statistics For the two-year period of invitations between 1 November 2016 and 31 October 2018; 2019*;
